# Supplementary material for: High Prevalence of Astigmatism in Children after School Suspension during the COVID-19 Pandemic Is Associated with Axial Elongation
Source: MDPI journal article supplement (doi:10.3390/children9060919), 2022-06-19
Supplement: s1 [file s1]

# Risk factors of myopia in Hong Kong primary school students

---

## Start of Block: Personal Information about Your Child

The ocular parameters and questionnaire information will be kept strictly confidential and will be used only for research purposes. If you agree to participate in our study (vision screening and questionnaire), please choose "Yes".

☐ Yes

☐ No

---

Page Break

## Personal Information about Your Child

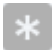

**Q1 Your child's name is (Family name/ First name, e.g. Chan Tai Man):**

---

---

**Q2 Please choose your child's gender:**

☐ Male

☐ Female

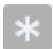

**Q3 Please provide your child's date of birth (YYYY/MM/DD, e.g. 2000/01/31):**

---

**Q5 Please choose your child's grade level:**

Click to input choice

▼ 1 ... 6

---

Page Break

**End of Block: Personal Information about Your Child**

---

**Start of Block: Information about Time outside School Hours**

**Q1**

During the school lockdown period,

Does your child spend time on the following activities on a weekday (including time for tutorial classes)?

|                                                          | Yes                   | No                    | Don't know            |
|----------------------------------------------------------|-----------------------|-----------------------|-----------------------|
| Printed materials<br>(reading, writing,<br>drawing, etc) | <input type="radio"/> | <input type="radio"/> | <input type="radio"/> |
| Television                                               | <input type="radio"/> | <input type="radio"/> | <input type="radio"/> |
| Computer (desktop/<br>laptop)                            | <input type="radio"/> | <input type="radio"/> | <input type="radio"/> |
| Tablet computer                                          | <input type="radio"/> | <input type="radio"/> | <input type="radio"/> |
| Smartphone                                               | <input type="radio"/> | <input type="radio"/> | <input type="radio"/> |

---

Page Break

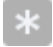

Q2 On the weekday during the school lockdown period,

how long does your child spend totally on following activities (including time for tutorial classes)?

|                                                    | Hours/day (e.g. 0.5) |
|----------------------------------------------------|----------------------|
| Printed materials (reading, writing, drawing, etc) |                      |
| Television                                         |                      |
| Computer (desktop/ laptop)                         |                      |
| Tablet computer                                    |                      |
| Smartphone                                         |                      |

---

Page Break

---

Q3

During the school lockdown period,

Does your child spend time on following activities (including time for tutorial classes) on the weekend?

|                                                          | Yes                   | No                    | Don't know            |
|----------------------------------------------------------|-----------------------|-----------------------|-----------------------|
| Printed materials<br>(reading, writing,<br>drawing, etc) | <input type="radio"/> | <input type="radio"/> | <input type="radio"/> |
| Television                                               | <input type="radio"/> | <input type="radio"/> | <input type="radio"/> |
| Computer (desktop/<br>laptop)                            | <input type="radio"/> | <input type="radio"/> | <input type="radio"/> |
| Tablet computer                                          | <input type="radio"/> | <input type="radio"/> | <input type="radio"/> |
| Smartphone                                               | <input type="radio"/> | <input type="radio"/> | <input type="radio"/> |

---

Page Break

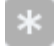

Q4

On the weekend **during the school lockdown period,**

Does your child spend time on following activities (including time for tutorial classes)?

|                                                    | Hours/day (e.g. 0.5) |
|----------------------------------------------------|----------------------|
| Printed materials (reading, writing, drawing, etc) |                      |
| Television                                         |                      |
| Computer (desktop/ laptop)                         |                      |
| Tablet computer                                    |                      |
| Smartphone                                         |                      |

---

Page Break

## End of Block: Information about Time outside School Hours

---

### Start of Block: Information about Outdoor Time outside School Hours

#### Q84 Information about Outdoors outside School Hours

**Outdoor physical activities include playing sports, running, riding a bike, etc.**

**Outdoor leisure activities include walking, having a picnic, etc.**

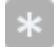

Q1 During the school lockdown period (from Monday to Friday),  
how long does your child spend on following activities?

|                             | Hours in total (e.g. 2) |
|-----------------------------|-------------------------|
| Outdoor physical activities |                         |
| Outdoor leisure activities  |                         |

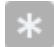

Q2 During the school lockdown period (Saturday and Sunday),  
how long does your child spend on following activities?

|                             | Hours in total (e.g. 2) |
|-----------------------------|-------------------------|
| Outdoor physical activities |                         |
| Outdoor leisure activities  |                         |

Page Break

End of Block: Information about Outdoor Time outside School Hours

Start of Block: Personal Information about Parents

### Personal Information about Biological Parents

Q1 Please choose father's ethnicity:

☐ Chinese

☐ Non-Chinese, please specify (e.g. Filipino, Indonesian, Caucasian):

☐ Mixed, please specify

**Q2 Please choose mother's ethnicity:**

☐ Chinese

☐ Non-Chinese, please specify (e.g. Filipino, Indonesian, Caucasian):

\_\_\_\_\_

☐ Mixed, please specify \_\_\_\_\_

-----  
Page Break \_\_\_\_\_



**Q3 The highest education attainment of father:**

- ☐ Primary or below
  - ☐ Lower Secondary
  - ☐ Upper Secondary
  - ☐ Post-secondary or above
- 

**Q4 The highest education attainment of mother:**

- ☐ Primary or below
  - ☐ Lower Secondary
  - ☐ Upper Secondary
  - ☐ Post-secondary or above
- 

Page Break

---

**Q5 Total monthly family income is (including all sources):**

- ☐ ≤HK\$ 9,999
- ☐ HK\$ 10,000 to HK\$ 14,999
- ☐ HK\$ 15,000 to HK\$ 19,999
- ☐ HK\$ 20,000 to HK\$ 24,999
- ☐ HK\$ 25,000 to HK\$ 29,999
- ☐ HK\$ 30,000 to HK\$ 39,999
- ☐ HK\$ 40,000 to HK\$ 59,999
- ☐ HK\$ 60,000 to HK\$ 79,999
- ☐ ≥HK\$ 80,000
- ☐ N/A

---

Page Break

**Q6 Has the child's father ever had his vision tested?**

- ☐ Yes
- ☐ No
- ☐ Don't know

---

Page Break

**Q7 Does the child's father suffer from myopia (near-/short-sightedness)?**

- ☐ Yes
- ☐ No
- ☐ Don't know

---

Page Break

**Q8 Does the child's father have 6.00 D or more myopia (if he had myopia surgery before, is original myopia degree 6.00 D or above) ?**

- ☐ Yes
- ☐ No
- ☐ Don't know

---

Page Break

**Q9 Has the child's mother ever had her vision tested?**

- ☐ Yes
- ☐ No
- ☐ Don't know

---

Page Break

**Q10 Does the child's mother suffer from myopia (near-/short-sightedness)?**

- ☐ Yes
- ☐ No
- ☐ Don't know

---

Page Break

**Q11 Does the child's mother have 6.00 D or more myopia (if she had myopia surgery before, is original myopia degree 6.00 D or above)?**

- ☐ Yes
- ☐ No
- ☐ Don't know

---

Page Break

**End of Block: Personal Information about Parents**

---
